# Supplementary material for: Pristine gelatin incorporation as a strategy to enhance the biofunctionality of poly(vinyl alcohol)-based hydrogels for tissue engineering applications
Source: Royal Society of Chemistry journal article supplement (doi:10.1039/d3bm01172k), 2023-10-31
Supplement: d3bm01172k1.pdf [file d3bm01172k1.pdf]

### Supplementary Information

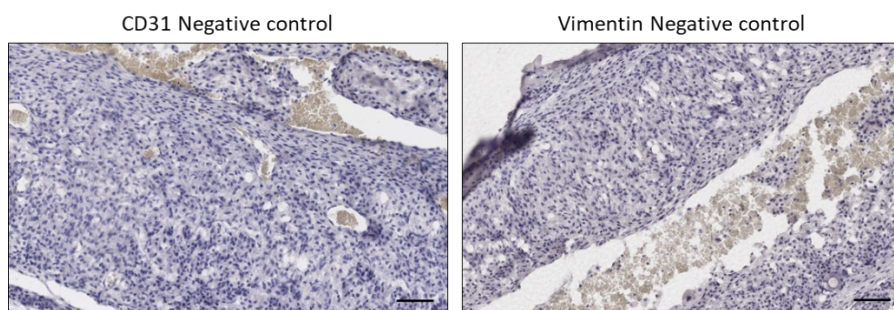

**Supplementary Fig. 1** Isotype controls for the CD31 and vimentin staining. Scale bar 100  $\mu\text{m}$ .
